# Supplementary material for: Hierarchically porous Fe–N–C derived from covalent-organic materials as a highly efficient electrocatalyst for oxygen reduction
Source: Royal Society of Chemistry journal article supplement (doi:10.1039/c6nr03273g), 2016-01-01
Supplement: c6nr03273g1.pdf [file c6nr03273g1.pdf]

Electronic Supplementary Material (ESI)

**Hierarchically porous Fe-N-C derived from covalent-organic material  
as highly efficient electrocatalyst for Oxygen Reduction†**

Quan Zuo,<sup>a</sup> Pingping Zhao,<sup>a</sup> Wei Luo<sup>a,b,c\*</sup> and Gongzhen Cheng<sup>a\*</sup>

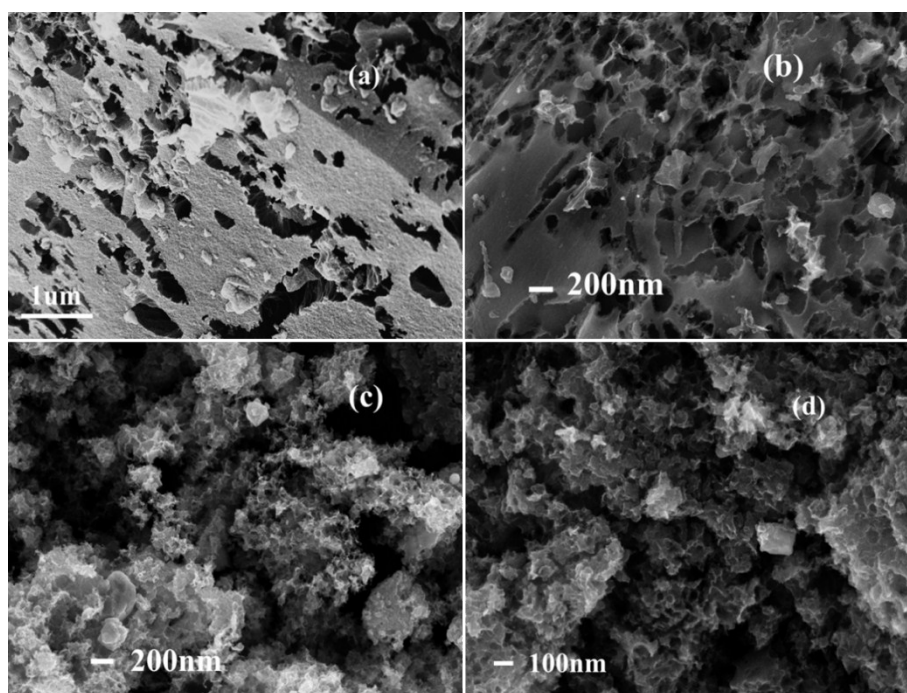

Fig. S1. SEM images of the catalysts pyrolysis at different target temperatures. (a, b) FeNC-800 (c, d) FeNC-1000

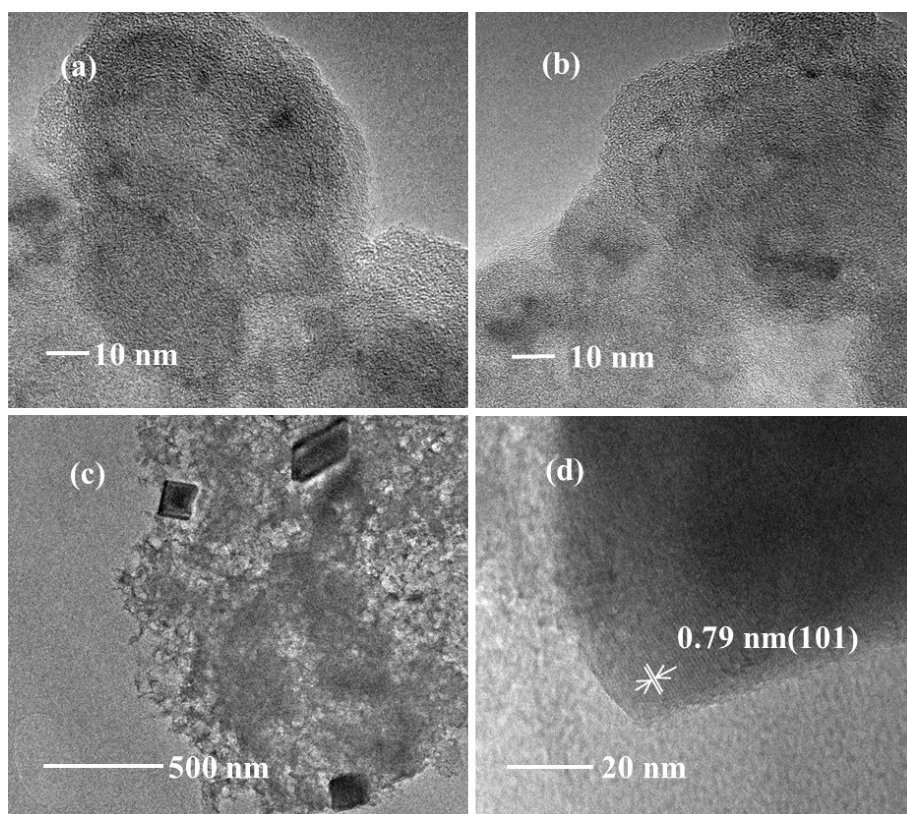

Fig. S2. TEM images of (a, b) FeNC-800 (c, d) FeNC-1000

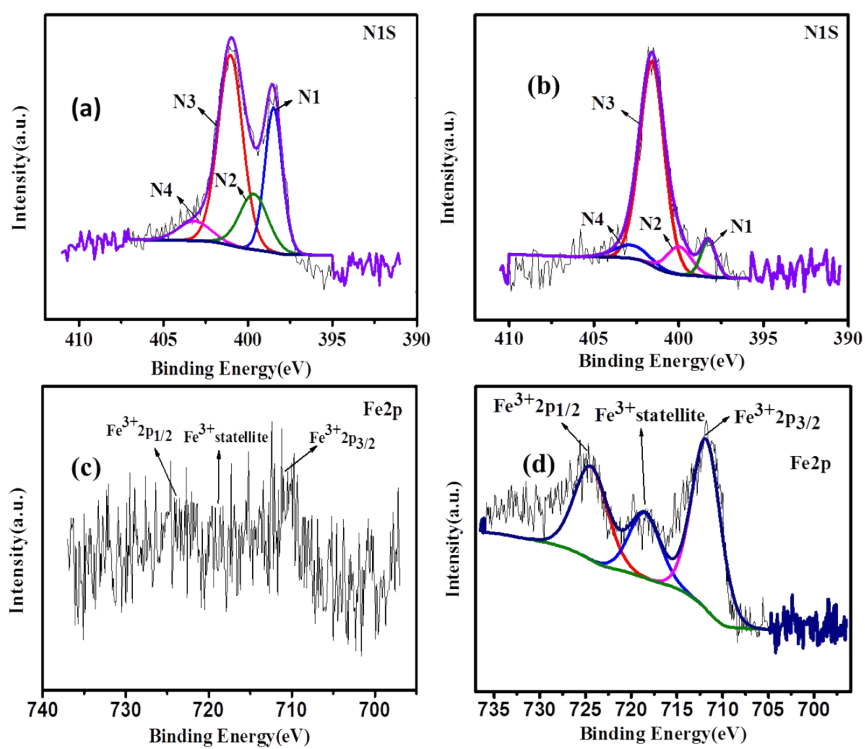

Fig. S3. The high-resolution N 1s and Fe 2p spectrum of (a, c) FeNC-800, (b, d) FeNC-1000

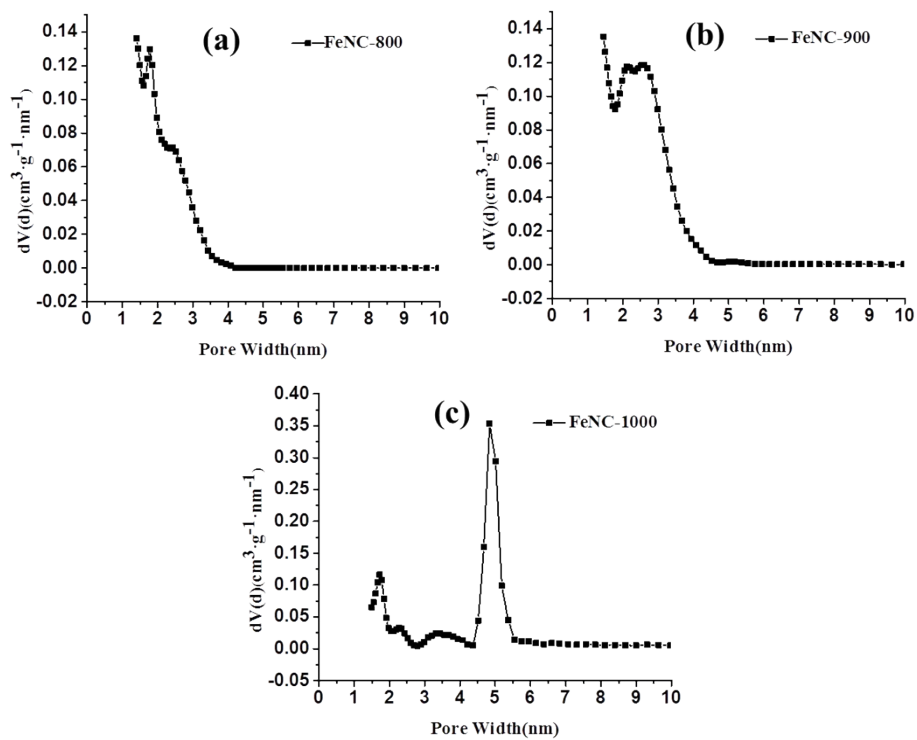

Fig. S4. Pore size distribution of FeNC-based catalysts

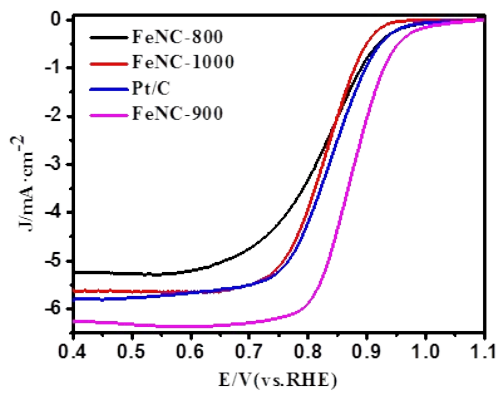

Fig. S5. Steady-state polarization curves of FeNC-based catalysts.

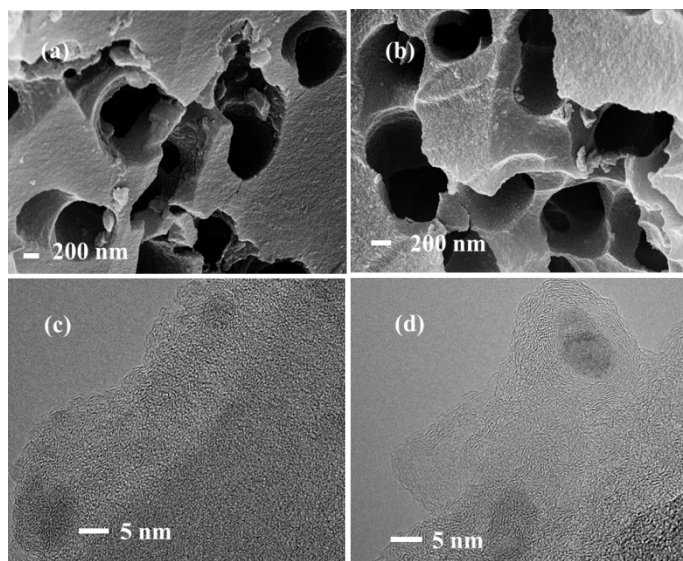

Fig. S6. SEM images of the FeNC-900 catalyst after accelerated durability test: (a) in 1M KOH solution, (b) in 1M HClO<sub>4</sub> solution.

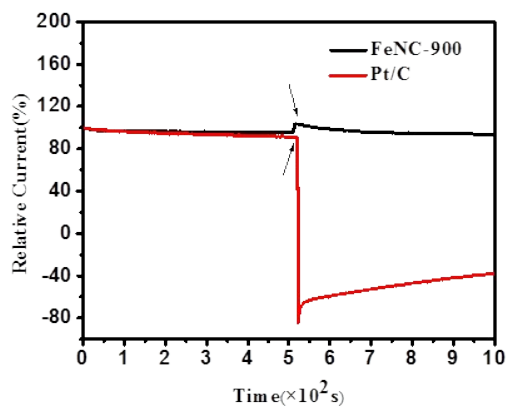

Fig. S7. Methanol-tolerance evaluation of FeNC-900 tested by the current–time chronoamperometric responses at 0.6 V versus RHE in O<sub>2</sub>-saturated (commercial 20% Pt/C is used for comparison) in 0.1 M KOH solution. The arrow represents the addition of 3 M methanol into the electrolyte.

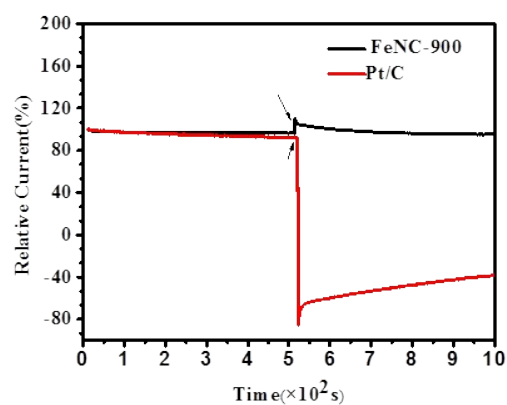

Fig. S8. Methanol-tolerance evaluation of FeNC-900 tested by the current–time chronoamperometric responses at 0.6 V versus RHE in O<sub>2</sub>-saturated (commercial 20% Pt/C is used for comparison) in 0.1 M HClO<sub>4</sub> solution. The arrow represents the addition of 3 M methanol into the electrolyte.

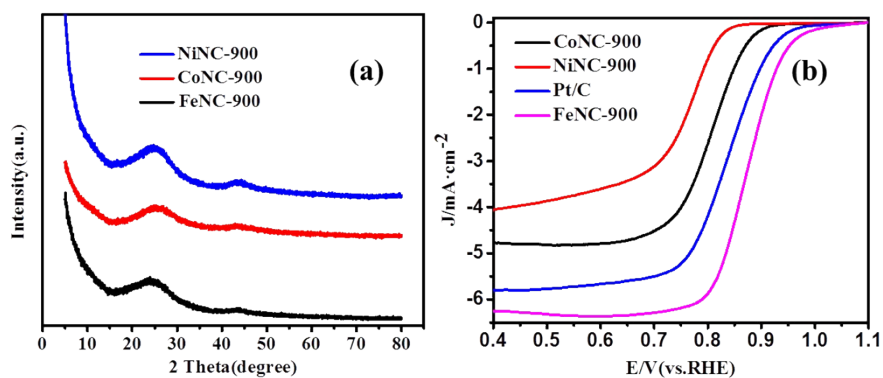

Fig. S9. (a) XRD and (b) Steady-state polarization curves of ORR of catalysts in 0.1 M KOH solution from different metal.

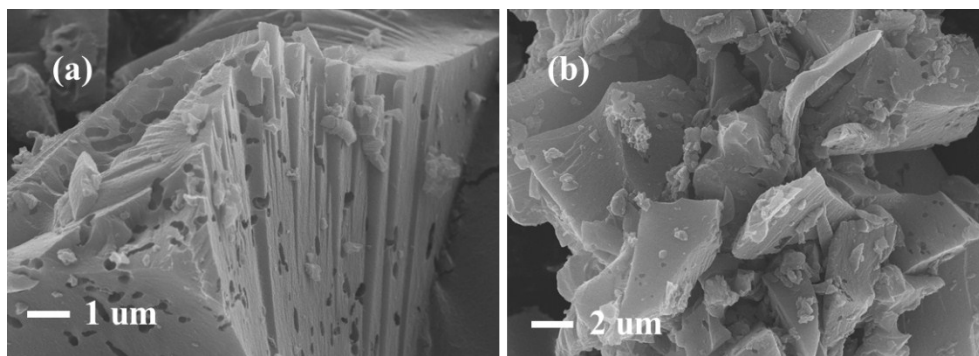

Fig. S10. SEM images of the catalysts (a) CoNC-900 and (b) NiNC-900.

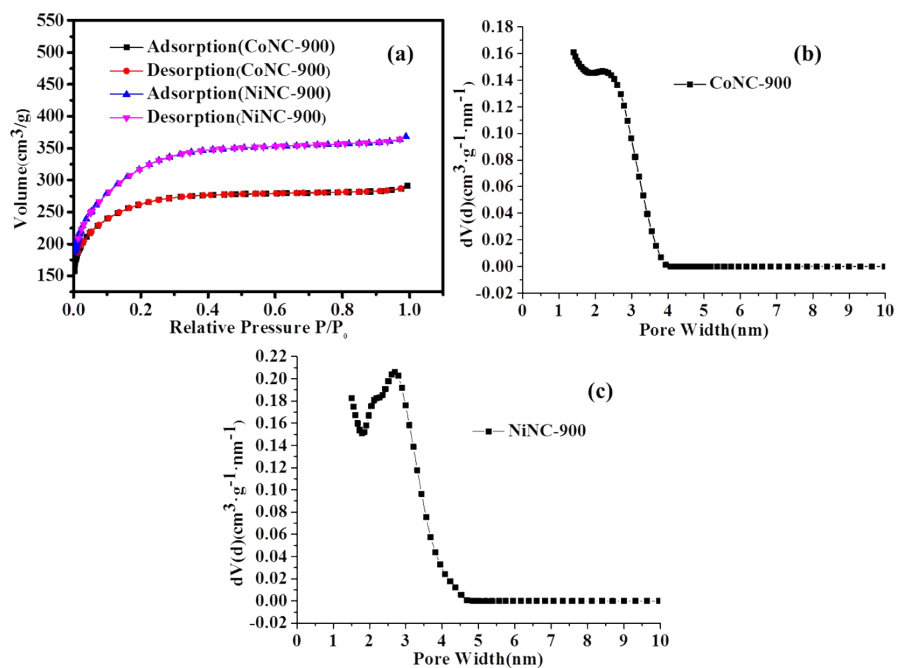

Fig. S11. (a)  $N_2$  adsorption-desorption isotherms of CoNC-900 and NiNC-900 catalyst, (b) Pore size distribution of CoNC-900 catalyst, (c) Pore size distribution of NiNC-900 catalyst.

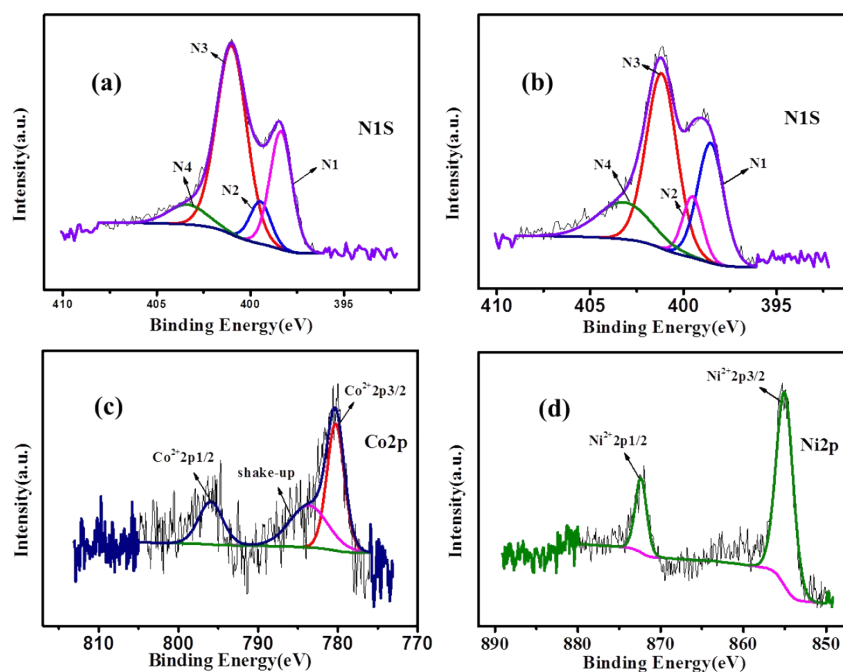

Fig. S12. The high-resolution N 1s and Co 2p (Ni 2p) spectrum of (a, c) CoNC-900, (b, d) NiNC-900

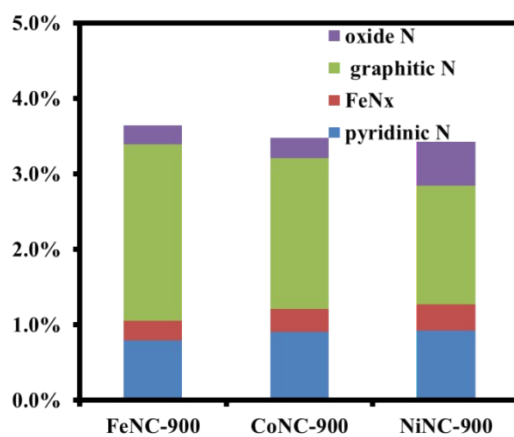

Fig. S13. The content of different N in the catalysts.

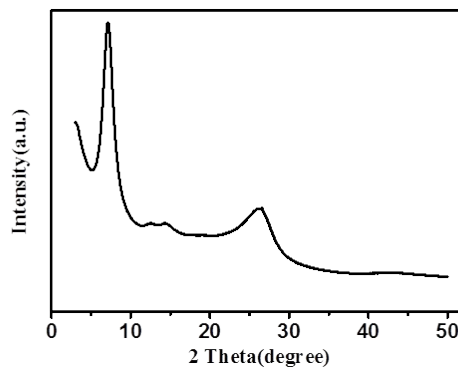

Fig. S14. XRD of CTF

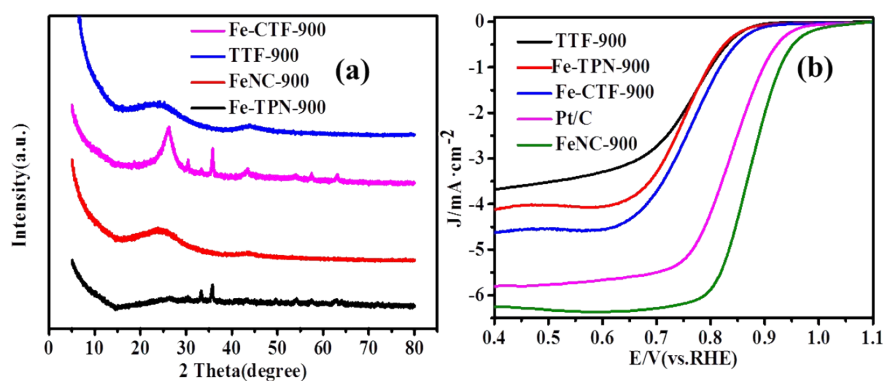

Fig. S15. (a) XRD and (b) Steady-state polarization curves of ORR of catalysts in 0.1 M KOH solution from different precursors.

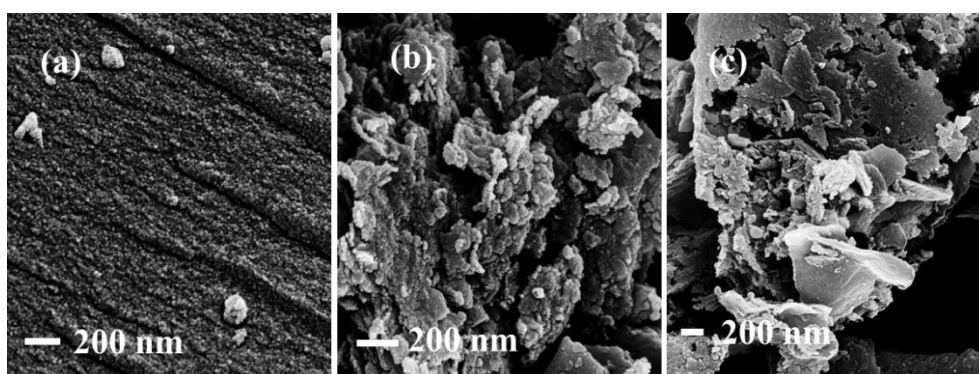

Fig. S16. SEM images of the catalysts (a) TTF-900, (b) Fe-TPN-900 and (c) Fe-CTF-900.

Table S1. Comparison of ORR catalytic performances in alkaline solution between FeNC-900 and other noble-metal-free electrocatalysts reported previously.

| Catalyst                   | Onset potential<br>(V vs. RHE) | Half-wave potential<br>(V vs. RHE) | The diffusion-limited<br>current density (mA/cm <sup>2</sup> ) | Ref.      |
|----------------------------|--------------------------------|------------------------------------|----------------------------------------------------------------|-----------|
| FeNC-900                   | 1.00                           | 0.88                               | 6.25                                                           | This work |
| Fe-N/C-800                 | 0.98                           | 0.81                               | 4.81                                                           | [1]       |
| Fe-N/C-800                 | 0.92                           | 0.81                               | 6.06                                                           | [2]       |
| Fe-N-C                     | 0.95                           | 0.86                               | 6.60                                                           | [3]       |
| Fe-N/G                     | 0.87                           | 0.78                               | 5.21                                                           | [4]       |
| Co-N-HPC                   | 0.91                           | 0.83                               | 5.00                                                           | [5]       |
| N:C-MgNTA                  | 0.89                           | 0.75                               | 5.70                                                           | [6]       |
| NCNTFs                     | 0.95                           | 0.87                               | 5.30                                                           | [7]       |
| NPC-F                      | 0.94                           | 0.84                               | 5.50                                                           | [8]       |
| Fe <sub>2</sub> N/N-GAs-20 | 1.02                           | 0.88                               | 4.80                                                           | [9]       |

|          |      |      |      |      |
|----------|------|------|------|------|
| pPMF-800 | 1.05 | 0.88 | 6.20 | [10] |
|----------|------|------|------|------|

Table S2. Comparison of ORR catalytic performances in acid solution between FeNC-900 and other noble-metal-free electrocatalysts reported previously.

| Catalyst                   | Onset potential<br>(V vs. RHE) | Half-wave potential<br>(V vs. RHE ) | The diffusion-limited<br>current density (mA/cm <sup>2</sup> ) | Ref.      |
|----------------------------|--------------------------------|-------------------------------------|----------------------------------------------------------------|-----------|
| FeNC-900                   | 0.85                           | 0.72                                | 5.95                                                           | This work |
| Fe-N/C-800                 | 0.80                           | 0.68                                | 6.09                                                           | [2]       |
| Fe <sub>2</sub> N/N-GAs-20 | 0.82                           | 0.65                                | 3.79                                                           | [9]       |
| pPMF-800                   | 0.89                           | 0.71                                | 6.10                                                           | [10]      |
| Fe/Co-CMP-800              | 0.88                           | 0.76                                | 4.70                                                           | [11]      |
| Co-N-C                     | 0.85                           | 0.76                                | 5.90                                                           | [12]      |
| Co-Zn-ZIF/GO-800           | 0.85                           | 0.70                                | 4.20                                                           | [13]      |
| H-Fe@N-C/RGO               | 0.89                           | 0.67                                | 7.80                                                           | [14]      |
| Fe-N/C-900                 | 0.58                           | 0.40                                | 5.78                                                           | [15]      |

(V vs. Ag/AgCl) (V vs. Ag/AgCl)

## Notes and references

- 1 W. Niu, L. Li, X. Liu, N. Wang, J. Liu, W. Zhou, Z. Tang and S. Chen, *J. Am. Chem. Soc.*, 2015, **137**, 5555–5562.
- 2 L. Lin, Q. Zhu and A. Xu, *J. Am. Chem. Soc.*, 2014, **136**, 11027–11033.
- 3 J. Sanetuntikul and S. Shanmugam, *Nanoscale*, 2015, **7**, 7644–7650.
- 4 Q. Lai and Q. Su, *ACS Appl. Mater. Inter.*, 2015, **7**, 18170–18178.
- 5 M. Dou, D. He, W. Shao, H. Liu, F. Wang and L. Dai, *Chem. Eur. J.*, 2016, **22**, 2896–2901.
- 6 D. Eisenberg, W. Stroek, N. J. Geels, C. S. Sandu, A. Heller, N. Yan and G. Rothenberg, *Chem. Eur. J.*, 2016, **22**, 501–505.
- 7 B. Y. Xia, Y. Yan, N. Li, H. B. Wu, X. W. Lou and X. Wang, *Nature Energy*, 2016, **1**, 1–8.
- 8 Z. Xu, X. Zhuang, C. Yang, J. Cao, Z. Yao, Y. Tang, J. Jiang, D. Wu and X. Feng, *Adv. Mater.*, 2016, **28**, 1981–1987.
- 9 L. Liu, X. Yang, N. Ma, H. Liu, Y. Xia, C. Chen, D. Yang and X. Yao, *Small*, 2016, **12**, 1295–1301.
- 10 W. Yang, X. Yue, X. Liu, L. Chen, J. Jia and S. Guo, *Nanoscale*, 2016, **8**, 959–964.



- 11 S. Brüller, H. Liang, U. I. Kramm, J. W. Krumpfer, X. Feng and K. Müllen, *J. Mater. Chem. A*, 2015, **3**, 23799–23808.
- 12 B. You, N. Jiang, M. Sheng, W. S. Drisdell, J. Yano and Y. Sun, *ACS Catal.*, 2015, **5**, 7068–7076.
- 13 J. Wei, Y. Hu, Y. Liang, B. Kong, J. Zhang, J. Song, Q. Bao, G. P. Simon, S. P. Jiang and H. Wang, *Adv. Funct. Mater.*, 2015, **25**, 5768–5777.
- 14 J. Wang, G. Wang, S. Miao, J. Liab and X. Bao, *Faraday Discuss.*, 2014, **176**, 135–151.
- 15 M. Yang, H. Chen, D. Yang a, Y. Gao and H. Li, *J. Power Sources*, 2016, **307**, 152–159.
